# Supplementary material for: Production of recombinant human IgG1 Fc with beneficial N-glycosylation pattern for anti-inflammatory activity using genome-edited chickens
Source: PubMed Central journal article supplement (PMC10235082; doi:10.1038/s42003-023-04937-5), 2023-06-01
Supplement: 42003_2023_4937_MOESM2_ESM.pdf [file 42003_2023_4937_MOESM2_ESM.pdf]

## Supplementary Information

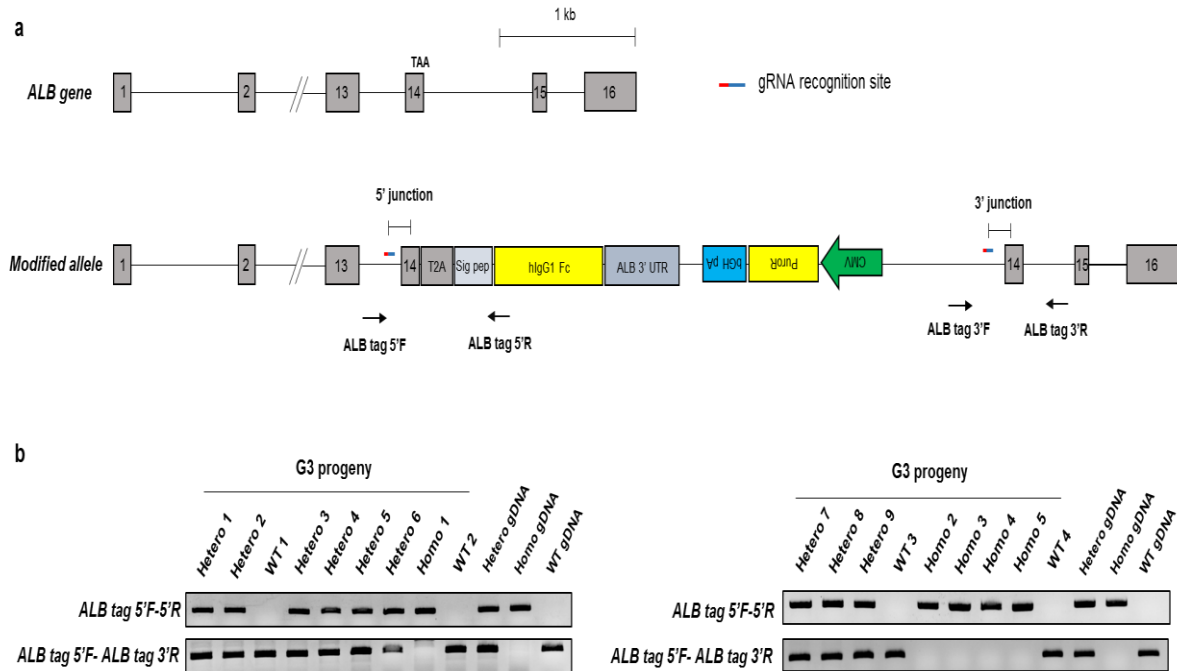

**Supplementary Figure 1. Generation of G3 *ALB::hlgG1 Fc* genome-edited progeny. (a)** Schematic illustration of the endogenous chicken *ALB* gene and the modified allele of hlgG1 tagged to Fc. Primers specific for the endogenous *ALB* gene and modified allele are denoted by arrows. **(b)** Genotyping of hatched G3 progeny. *ALB tag 5'F-5'R* primers designed specifically to amplify the modified allele, and *ALB tag 5'-ALB tag 3'R* primers designed specifically to amplify the endogenous *ALB* gene. Wild-type progeny showed amplicons of the endogenous *ALB* gene only; heterozygous progeny showed amplicons of both endogenous *ALB* gene and the modified allele; homozygous progeny showed amplicons of only the modified allele. Hetero : Heterozygous; Homo : Homozygous; WT : Wild type

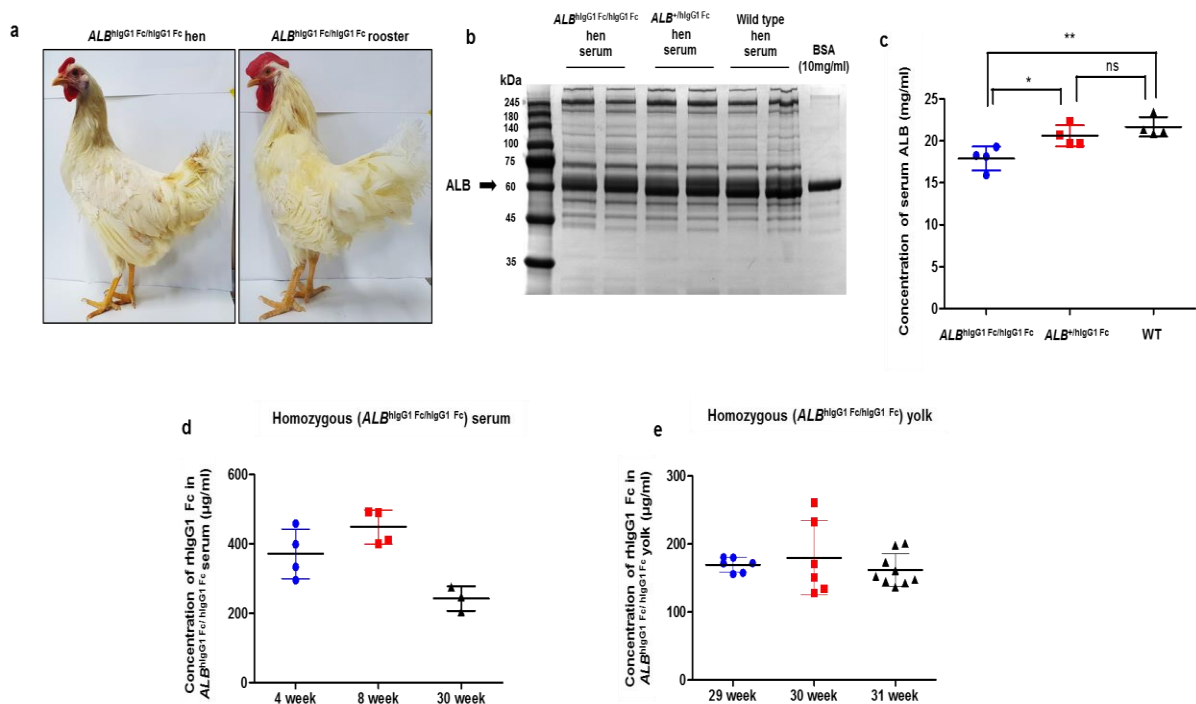

**Supplementary Figure 2. Sexual maturation and accumulation of rhIgG1 Fc in serum and egg yolk of homozygous *ALB<sup>hlgG1 Fc/hlgG1 Fc</sup>* chickens.** (a) Sexually matured 30 weeks after hatching of G3 homozygous hen and rooster. (b) SDS-PAGE of homozygous, heterozygous and wild type hen serum. Each serum was 200-fold diluted and stained with Coomassie Brilliant Blue solution. Arrow indicates serum ALB band. (c) Estimated concentration of ALB in serum of homozygous, heterozygous and wild type hen using Coomassie Brilliant Blue staining. The concentration was estimated using ImageJ software. 10 mg/ml of bovine serum albumin (BSA) was used as standard for calculation. ( $n=4$  of independent samples) (d) Concentration of rhIgG1 Fc in serum from homozygous *ALB<sup>hlgG1 Fc/hlgG1 Fc</sup>* chickens at 4, 8, and 30 weeks after hatching. Each dot represents individual chickens. ( $n=3-4$  of independent samples) (e) Concentration of rhIgG1 Fc in homozygous *ALB<sup>hlgG1 Fc/hlgG1 Fc</sup>* egg yolks at 29, 30, and 31 weeks after hatching. Each dot represent individual eggs from three individual hens. ( $n=6-9$  of independent samples) Differences among groups were determined by one-way ANOVA. \*  $P < 0.05$ , \*\*  $P < 0.01$ . Error bars represents standard deviation.

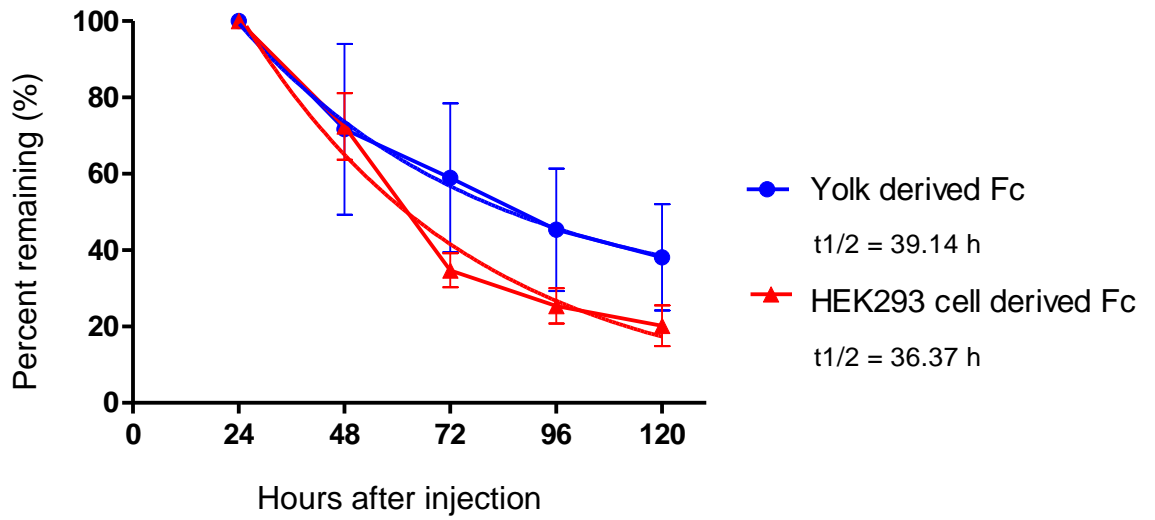

**Supplementary Figure 3. In vivo serum half life of rhIgG1 Fc derived from *ALB::hIgG1 Fc* chickens.** Clearance of rhIgG1 Fc derived from *ALB::hIgG1 Fc* chicken and recombinant Fc derived from HEK293T cell. Each reagent was i.p. injected into 8 weeks of female C57BL/6 mouse at dose of 100  $\mu\text{g}/\text{mouse}$ . After 24 h of injection, serum concentration was measured by ELISA for 5 days. The percent remaining was expressed as percent of 24 h value that the first time-point of measurement ( $n=4$  of independent samples). Error bars represents standard deviation.

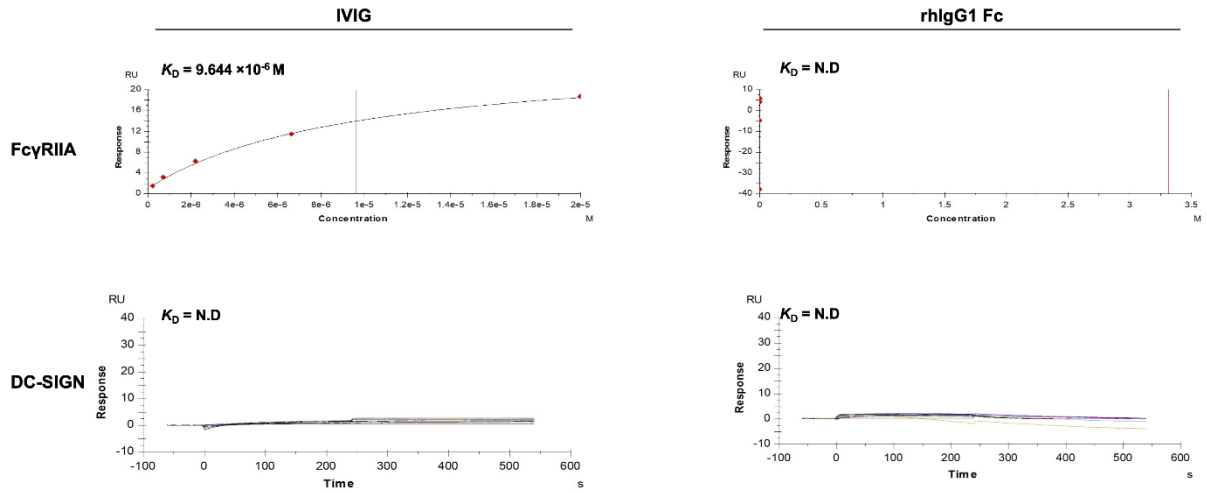

**Supplementary Figure 4. Affinity of rhIgG1 Fc purified from *ALB::hIgG1 Fc* chickens for Fc $\gamma$ RIIA and DC-SIGN and comparison of that of human IVIG.** Sensorgrams showing binding of IVIG and rhIgG1 Fc to hFc $\gamma$ RIIA and DC-SIGN (Biacore analysis). Binding to hFc $\gamma$ RIIA was evaluated using single cycle kinetics and that to DC-SIGN using a steady state equilibrium model.

**Supplementary Figure 5. Unprocessed gel image.**

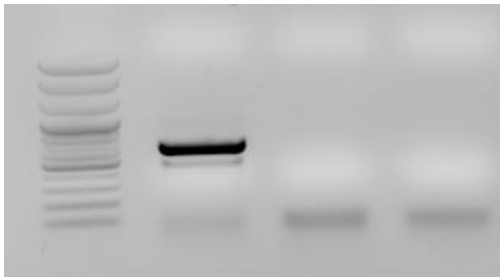

Figure 1b. ALB Tag 5'F-R

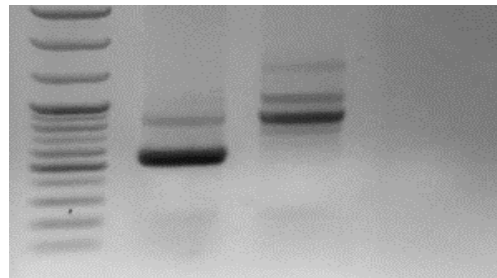

Figure 1b. ALB Tag 3'F-R

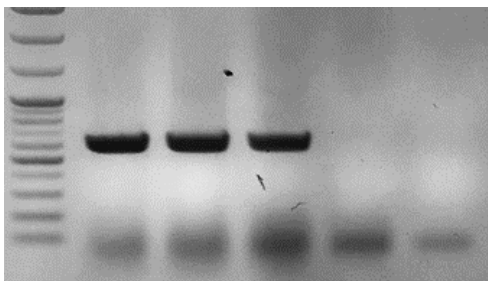

Figure 1e ALB Tag 5'F-R

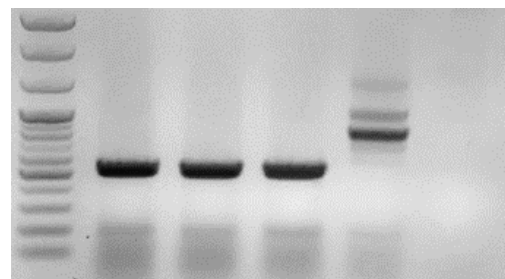

Figure 1e ALB Tag 3'F-R

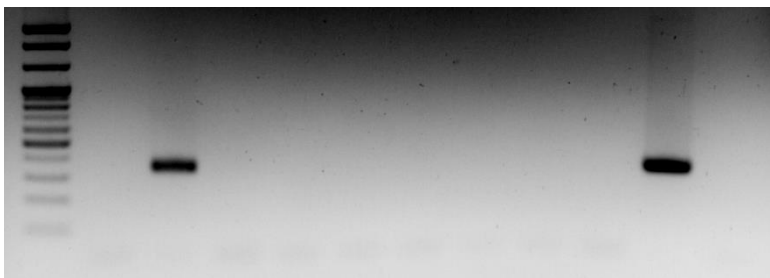

Figure 2a upper panel hIgG1 Fc transcript

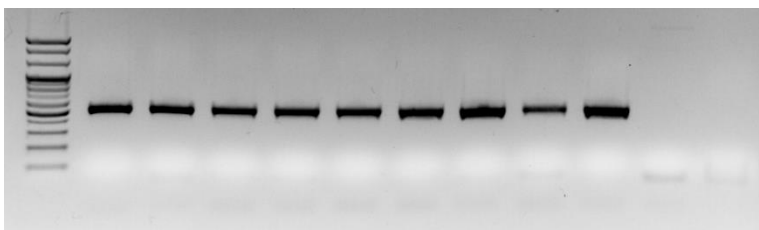

Figure 2a lower panel hIgG1 Fc transcript

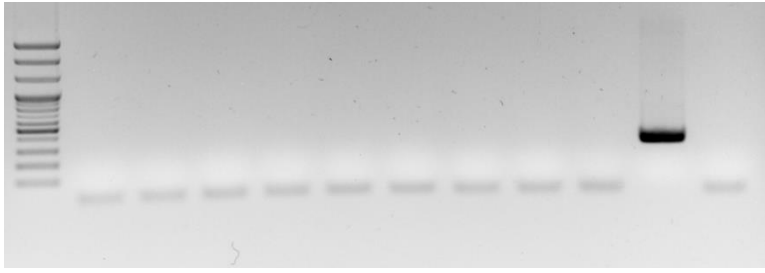

Figure 2a lower panel hIgG1 Fc transcript

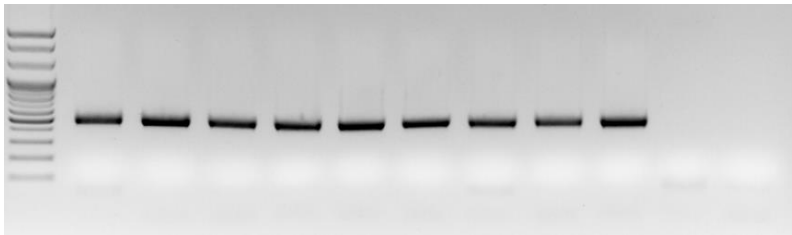

Figure 2a lower panel GAPDH

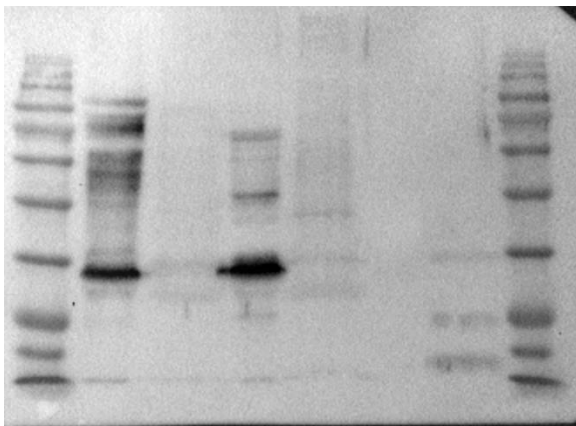

Figure 3e upper panel

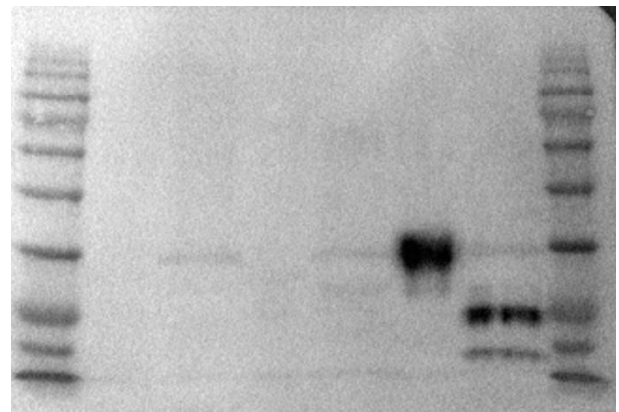

Figure 3e lower panel

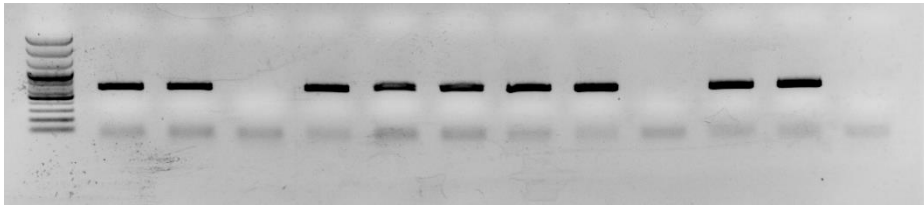

Supplementary Figure 1b upper panel left

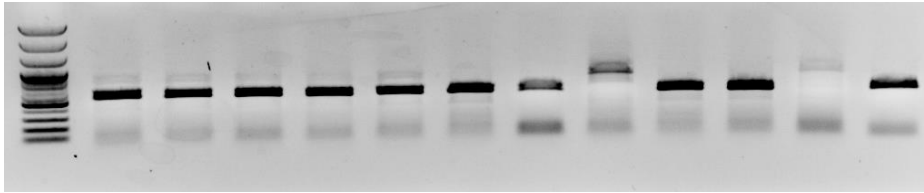

Supplementary Figure 1b lower panel left

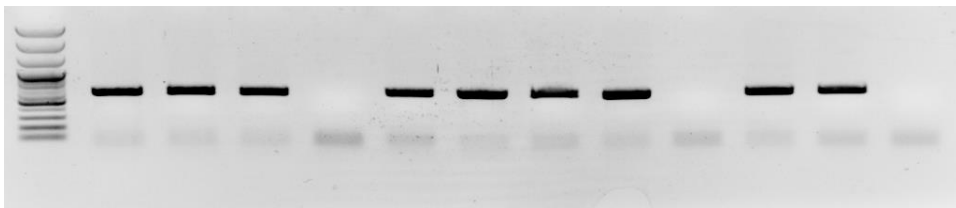

Supplementary Figure 1b upper panel right

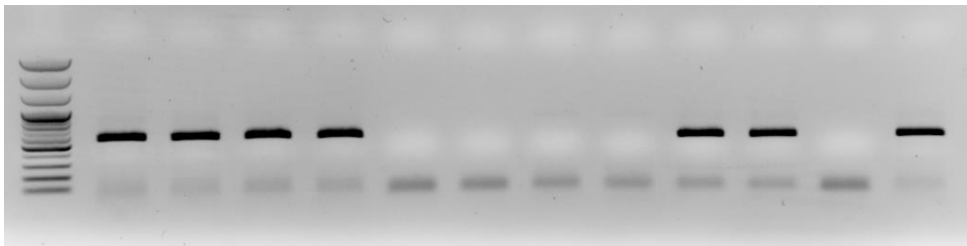

Supplementary Figure 1b lower panel right

**Supplementary Table 1. Efficiency of germline transmission and genome edited chick production for *ALB::hIgG1 Fc* donor PGCs**

| Wing tag ID | Donor cell type                  | No. of hatched chicks | No. of endogenous germ-cell-derived chicks <sup>†</sup> (%) | No. of donor germ-cell-derived chicks <sup>‡</sup> (%) | No. of <i>ALB::hIgG1 Fc</i> chicks (%) <sup>‡</sup> |
|-------------|----------------------------------|-----------------------|-------------------------------------------------------------|--------------------------------------------------------|-----------------------------------------------------|
| F0357       | <i>ALB::hIgG1 Fc</i> WL male PGC | 75                    | 66 (88.0)                                                   | 9 (12.0)                                               | 6 (66.6)                                            |
| F0371       | <i>ALB::hIgG1 Fc</i> WL male PGC | 102                   | 100 (98.1)                                                  | 2 (1.9)                                                | 1 (50.0)                                            |

\* Test-cross analysis was conducted by mating between WL (*I/I*) and germ-line chimeric KO (*i/i*) in which *ALB::hIgG1 Fc* donor PGCs of WL (*I/I*) were transplanted. Therefore, germ-line chimeric KO will produce spermatozoa that derived from endogenous KO germ cells (*i*) and WL germ cells (*I*). The phenotype of progeny derived from endogenous KO germ cell will be hybrid (*I/i*) and derived from donor PGCs will be WL (*I/I*).

<sup>†</sup> The phenotype of offspring derived from donor PGCs of WL (*I/I*)

<sup>‡</sup> The percentage of *ALB::hIgG1 Fc* chicks in donor germ-cell-derived chicks.



**Supplementary Table 2. rhIgG1 Fc concentration in serum of G1, G2, G3 heterozygous *ALB::hIgG1 Fc* progenies.**

| <b>Generation</b> | <b>Individual number</b> | <b>hIgG1 Fc concentration (µg/ml)</b> |
|-------------------|--------------------------|---------------------------------------|
| <b>G1</b>         | F0297                    | 133.17                                |
|                   | F0318                    | 114.79                                |
| <b>G2</b>         | F0731                    | 137.09                                |
|                   | F0739                    | 179.41                                |
|                   | F0732                    | 182.63                                |
|                   | F0754                    | 119.58                                |
|                   | F0757                    | 181.09                                |
|                   | F1355                    | 202.21                                |
|                   | F1349                    | 196.85                                |
|                   | F1341                    | 146.61                                |
|                   | F1296                    | 132.24                                |
|                   | F1294                    | 170.88                                |
| <b>G3</b>         | K0755                    | 161.61                                |
|                   | K0757                    | 206.06                                |
|                   | K0762                    | 201.97                                |
|                   | K0765                    | 238.55                                |
|                   | C0764                    | 205.33                                |
|                   | C0775                    | 271.84                                |
|                   | C0767                    | 223.14                                |
|                   | C0769                    | 70.06                                 |
|                   | C0773                    | 232.81                                |
|                   | C0776                    | 108.59                                |

**Supplementary Table 3. Oligonucleotides used in this study**

| Name             | Sequence                      |
|------------------|-------------------------------|
| ALB tag 5' F     | 5'-GAGCAATCTCTGTCAATGGAAGC-3' |
| ALB tag 5' R     | 5'-ACATGGAGGGCACGTGTGAG-3'    |
| ALB tag 3' F     | 5'-AGGGGTTCCGCGCACATTTC-3'    |
| ALB tag 3' R     | 5'-GATATTGTAGGCCACCCACTG-3'   |
| hIgG1 Fc RT-F    | 5'-GCGTCGTGGTGGATGTCTCTC-3'   |
| hIgG1 Fc RT-R    | 5'-GCTCTCTTGGCTGGCCCTTAG-3'   |
| Chicken GAPDH F  | 5'-GGTGGCCATCAATGATCCCT-3'    |
| Chicken GAPDH R  | 5'-TGATGGCATGGACAGTGGTC-3'    |
| Murine FcγRIIB F | 5'-CCCTGGGA ACTCTTCTACCC-3'   |
| Murine FcγRIIB R | 5'-CAGCAGCCAGTCAGAAATCA-3'    |
| Murine IL-33 F   | 5'-CCTTCTCGCTGATTCCAAG-3'     |
| Murine IL-33 R   | 5'-CCGTTACGGATATGGTGGTC-3'    |
| Murine IL-4 F    | 5'-TCAACCCCCAGCTAGTTGTC-3'    |
| Murine IL-4 R    | 5'-TGTTCTTCGTTGCTGTGAGG-3'    |
| Murine GAPDH F   | 5'-CAGAACATCATCCCTGCATCC-3'   |
| Murine GAPDH R   | 5'-CAGATGCCTGCTTCACCACC-3'    |
