# Supplementary material for: Production of recombinant human IgG1 Fc with beneficial N-glycosylation pattern for anti-inflammatory activity using genome-edited chickens
Source: PubMed Central journal article supplement (PMC10235082; doi:10.1038/s42003-023-04937-5), 2023-06-01
Supplement: 42003_2023_4937_MOESM3_ESM.pdf [file 42003_2023_4937_MOESM3_ESM.pdf]

## Description of Additional Supplementary Files

**File name:** Supplementary Data 1

**Description:** Numerical source data for graphs
